# Supplementary material for: MiR-210 promotes sensory hair cell formation in the organ of corti
Source: PubMed Central journal article supplement (PMC4848794; doi:10.1186/s12864-016-2620-7), 2016-04-27

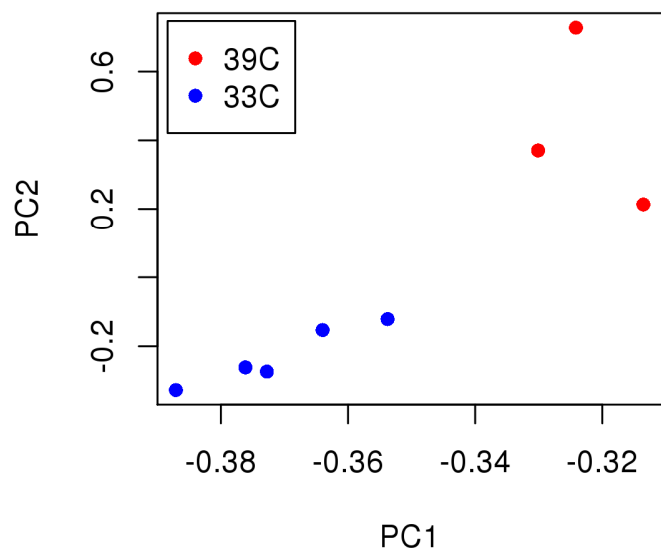

Supplement: 12864_2016_2620_MOESM2_ESM.pdf [file 12864_2016_2620_MOESM2_ESM.pdf]
